# Supplementary material for: Direct laser writing carbonization of polyimide films enabled multilayer structures for the use in interfacial solar-driven water evaporation
Source: Royal Society of Chemistry journal article supplement (doi:10.1039/d2ta02557d), 2022-01-01
Supplement: d2ta02557d1.pdf [file d2ta02557d1.pdf]

## Direct Laser Writing Carbonization of Polyimide Films Enabled Multilayer Structures for the Use of Interfacial Solar-Driven Water Evaporation

Chang Xu, Fan Gao, Jiajin Tang, Yanbo Yao, Tao Liu\*

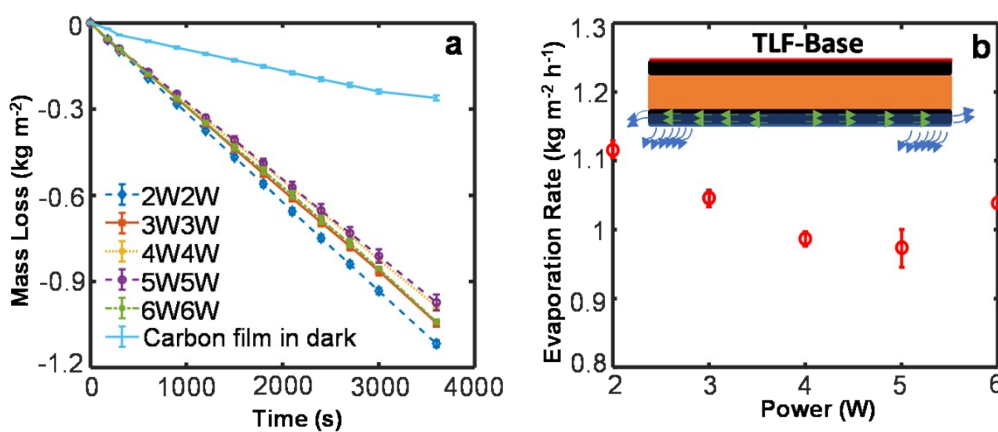

Figure S1. Mass loss (a) and the water evaporation rate (b) of the TLF-Base film (prepared by different laser powers) enabled interfacial solar-driven water evaporation system when immersed in NaCl solution (3.5 wt. %) and under one-sun illumination for 1 hr. Inset in (b) schematically shows the vapor generation sites for the TLF-Base film.

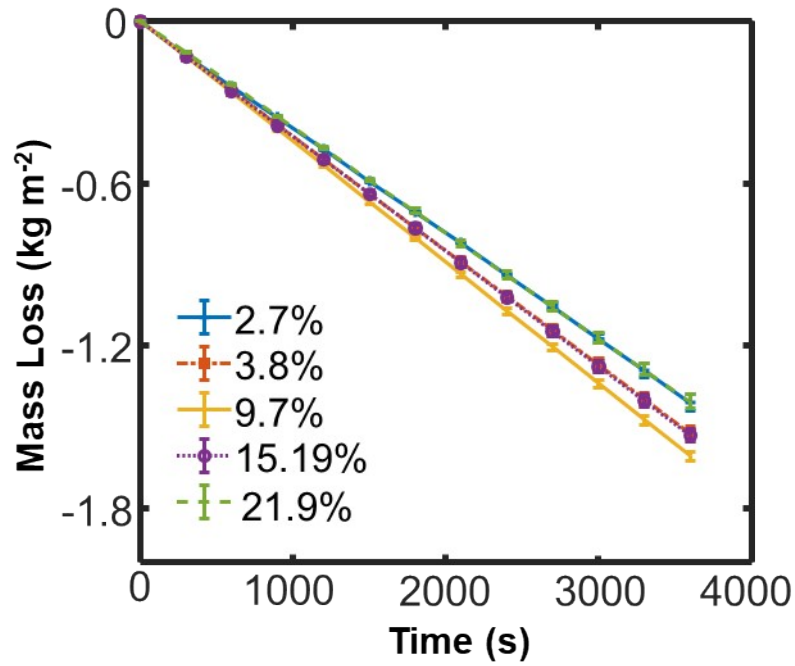

Figure S2. Mass loss results of the NaCl solution (3.5wt%) for the 2W TLF enabled interfacial solar-driven water evaporation system under one-sun illumination for 1 hr. The legend indicates the value of the hole opening areal fraction.

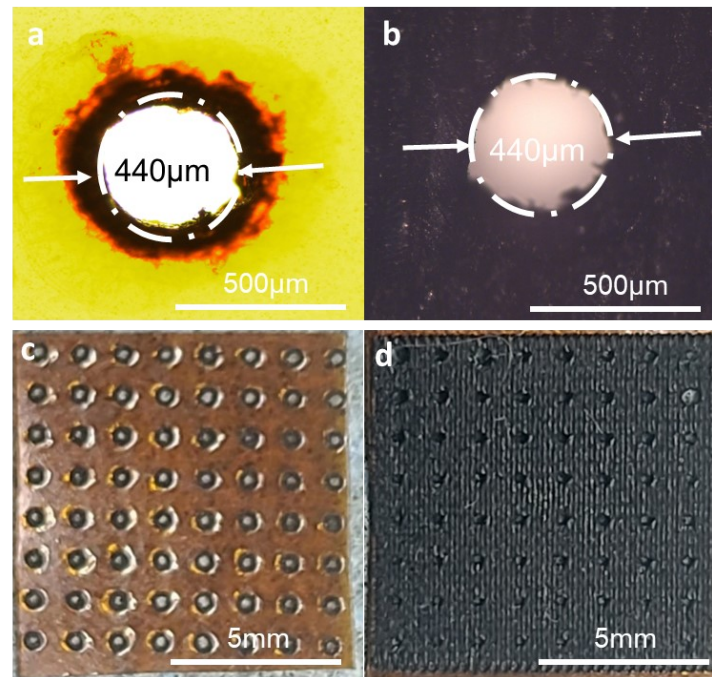

Figure S3. Optical graphs to show the size and the arrangement of the holes in a 2 W TLF system. (a, c) Holes on the PI film before DLWC process; (b, d) Holes on the carbon/PI/carbon tri-layer film after DLWC process.

Table S1 Square-arrayed hole parameters used in creating TLF films

| Arrangement of holes | The spacing of holes | Proportion of holes area |
|----------------------|----------------------|--------------------------|
| 4*4                  | 2.5 mm               | 2.4 %                    |
| 5*5                  | 2 mm                 | 3.8 %                    |
| 8*8                  | 1.3 mm               | 9.7 %                    |
| 10*10                | 0.9 mm               | 15.19 %                  |
| 12*12                | 0.8 mm               | 21.9 %                   |

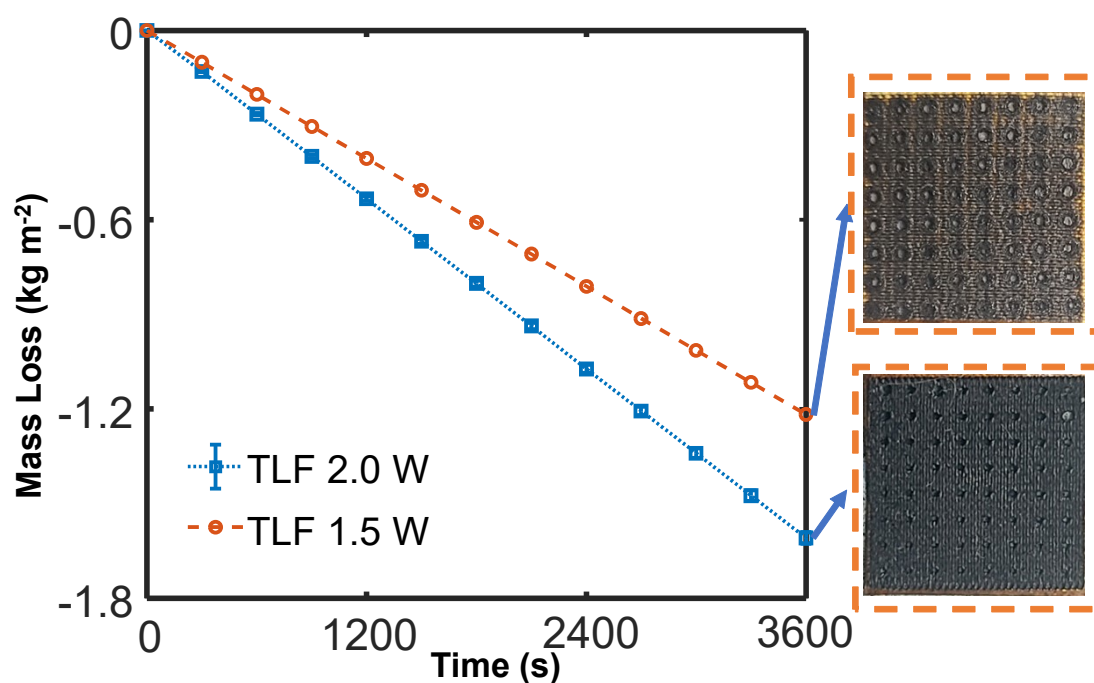

Figure S4. Comparison on the mass loss results of the NaCl solution (3.5 wt. %) for the 2 W and 1.5 W TLF enabled interfacial solar-driven water evaporation system under one-sun illumination for 1 hr. The water evaporation rates are 1.61 and 1.22 kg m<sup>-2</sup> h<sup>-1</sup>, respectively.

Insets are the optical images of the DLWc created light absorbing layer respectively created at 1.5 W and 2 W.

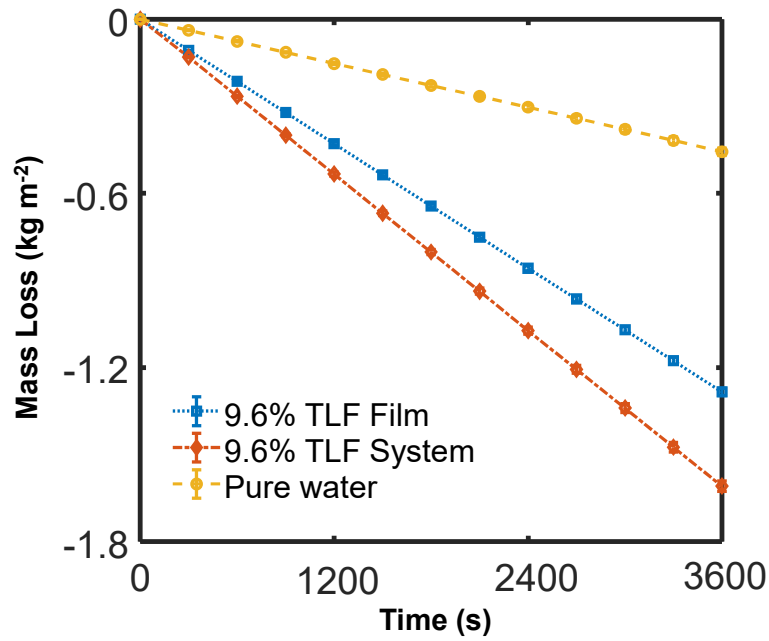

Figure S5. Comparison on the mass loss results of the NaCl solution (3.5 wt. %) for the 2 W TLF system (assembled with PU foam and filter paper), 2 W MTLF film (self-floating on the NaCl solution), and pure NaCl solution under one-sun illumination for 1 hr. The water evaporation rates are 1.61, 1.28 and 0.46 kg m<sup>-2</sup> h<sup>-1</sup>, respectively.

Table S2 Sample size information for the DLWc processed multi-layer films used in TLF-Base, TLF and BLV interfacial solar-driven water evaporation systems (see Figure S7 for the definition of the geometric parameters in BLV system)

| Sample   | Length (mm) | Width (mm) | Apex Angle (degree) | Height (mm) |
|----------|-------------|------------|---------------------|-------------|
| TLF-Base | 10 mm       | 10 mm      | N/A                 | N/A         |
| TLF      | 10 mm       | 10 mm      | N/A                 | N/A         |
| 30° BLV  | 20 mm       | 10 mm      | 30                  | 10          |
| 60° BLV  | 23 mm       | 10 mm      | 60                  | 10          |
| 90° BLV  | 28 mm       | 10 mm      | 90                  | 10          |
| 120° BLV | 40 mm       | 10 mm      | 120                 | 10          |
| 150° BLV | 77 mm       | 10 mm      | 150                 | 10          |

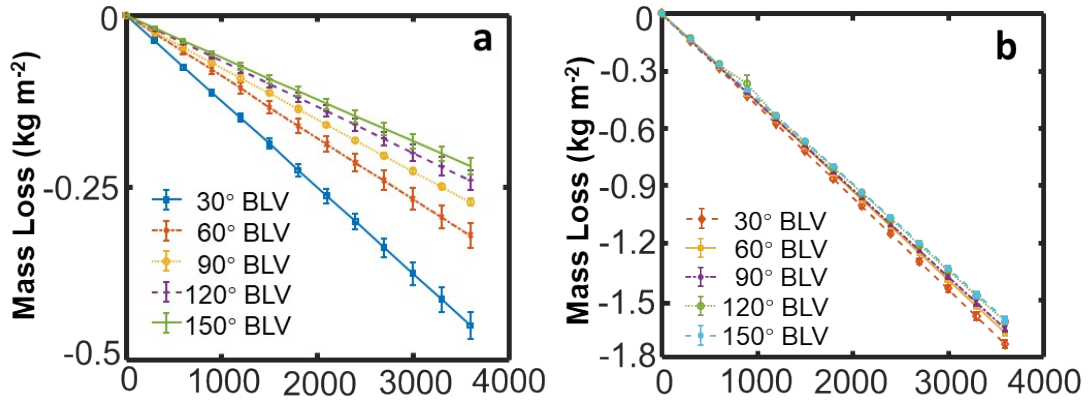

Figure S6. (a) Mass loss results of the NaCl solution (3.5 wt. %) when the BLV enabled interfacial solar-driven water evaporation system was under dark for 1 hr (b) Mass loss results of the NaCl solution (3.5 wt. %) when the BLV enabled interfacial solar-driven water evaporation system was under one-sun illumination for 1 hr

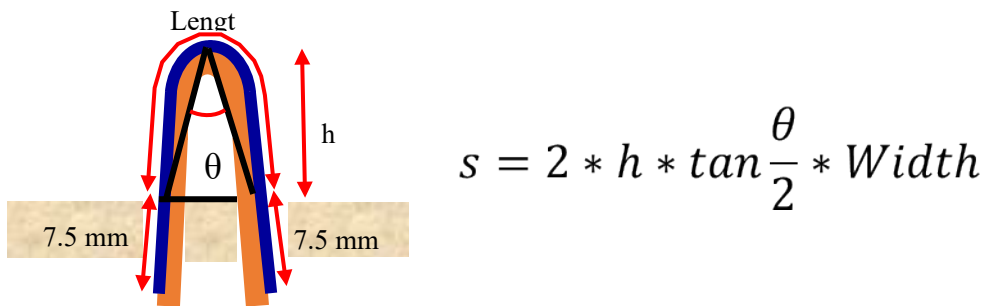

Figure S7. Calculation of the projected floor area -  $s$  for a BLV system.  $\theta$  and  $h$  are respectively the apex angle and height of the BLV system; and Length and Width are respectively the length and the width of the light absorbing carbon region. The values of  $\theta$ ,  $h$ , Length and Width for the BLV systems of different apex angles can be found in Table S2.

Table S3 Values of the projected floor area and the true area of the light absorbing layer in BLV system of different apex angles

| Sample   | Projected Area- $s(\text{mm}^2)$ | True light absorbing Area ( $\text{mm}^2$ ) |
|----------|----------------------------------|---------------------------------------------|
| 30° BLV  | 53.59 $\text{mm}^2$              | 350 $\text{mm}^2$                           |
| 60° BLV  | 115.47 $\text{mm}^2$             | 380 $\text{mm}^2$                           |
| 90° BLV  | 200 $\text{mm}^2$                | 430 $\text{mm}^2$                           |
| 120° BLV | 346.41 $\text{mm}^2$             | 550 $\text{mm}^2$                           |
| 150° BLV | 746.41 $\text{mm}^2$             | 920 $\text{mm}^2$                           |

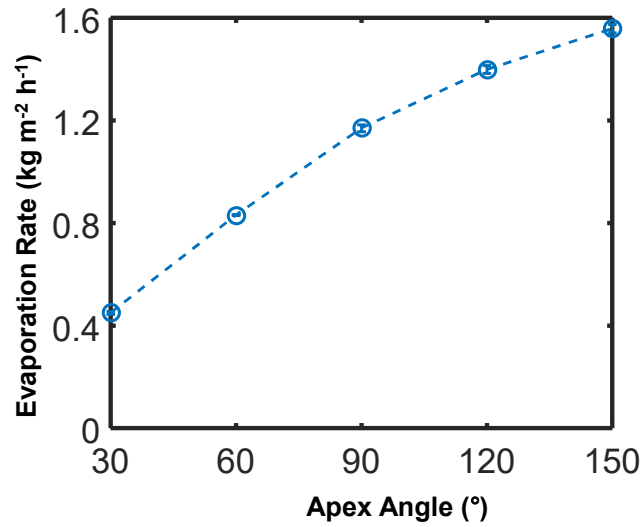

Figure S8. Water evaporation rate evaluated by using the true area of the carbon layer as the normalization factor for the BLV systems of different apex angles when under one-sun illumination.

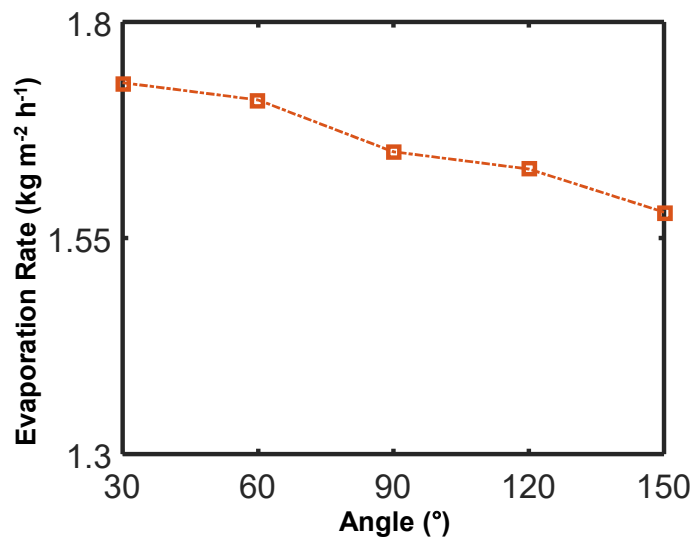

Figure S9. Water evaporation rate under one-sun illumination for the BLV systems of different apex angles when its height was varied but the carbon layer length was maintained at a constant value of 20 mm.

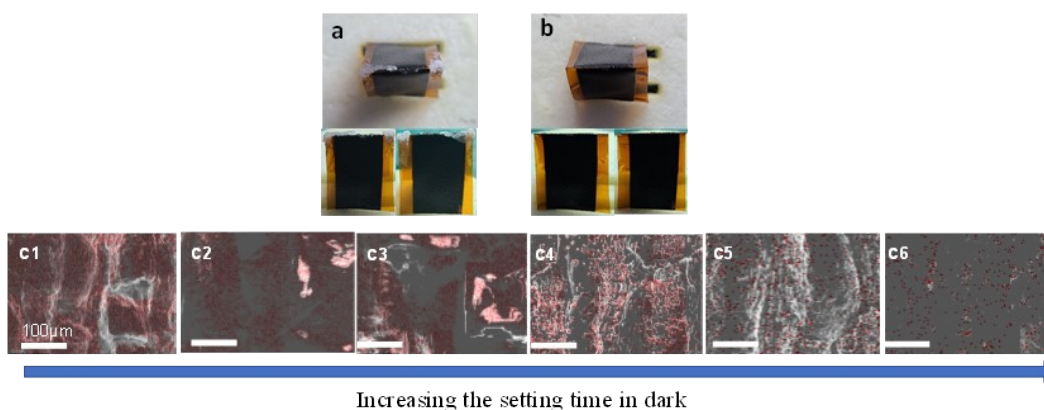

Figure S10. (a) Optical image of 30° BLV under 6hr one sun illumination (b) Optical image of (a) after 8hr setting in the dark. (c1) - (c6) EDS mapping image of BLV set in dark for 0h,1h,2h,4h,6h,8h (red color indicates solidum element).

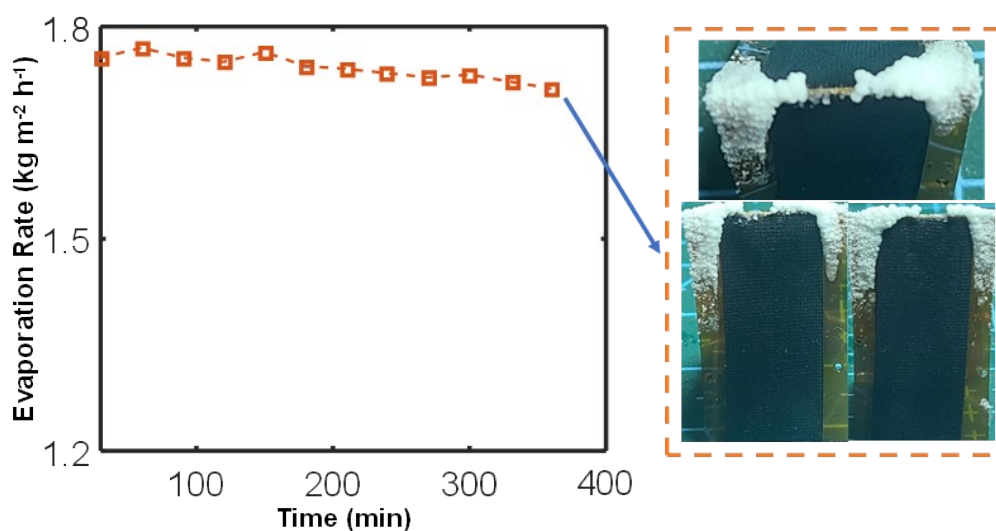

Figure S11. Effect of the operational time on the evaporation rate of a 30° BLV system under one sun illumination. The system was prepared by folding a hydrophilic carbon/PI bilayer film that is used for preparing the 120° BLV system with carbon layer length of 40 mm (Table S2) into 30°. The inset shows the optical images of the BLV system after 6hr evaporation operation, which indicates the salts are mostly accumulated in the ridge region of the light absorbing carbon layer.

Table S4 Comparison of the characteristics of the TLF and BLV interfacial solar drive water evaporation systems created by DLWc method

|            | Manufacturing and Assembling Capability                                                                         | Water Evaporation Rate under One-Sun Illumination |                                                                                | Salt Resistance Performance                                                                          | Long-term Durability                                                                                    |
|------------|-----------------------------------------------------------------------------------------------------------------|---------------------------------------------------|--------------------------------------------------------------------------------|------------------------------------------------------------------------------------------------------|---------------------------------------------------------------------------------------------------------|
|            |                                                                                                                 | 1hr                                               | 1day                                                                           |                                                                                                      |                                                                                                         |
| <b>TLF</b> | Tri-layer film preparation involves a somewhat laborious manufacturing process, but the system assembly is easy | Excellent, as high as 93.2 %                      | Excellent, maintaining 95.7 % of the original rate                             | Good, minor salt accumulation at the edges of the system (both exterior edge and interior hole edge) | Excellent, no deterioration on the water evaporation rate during 6 months of test                       |
| <b>BLV</b> | Two-layer film manufacturing process is easy, but the system assembly is somewhat difficult                     | Good, as high as 89.0 %                           | Depending upon apex angle; 30° system can maintain 97.9 % of the original rate | Fair/Good, apparent salt accumulation but mostly concentrated in the ridge region of the V-shape     | Good, no deterioration on the water evaporation rate upon 30 cycles of on-off one sun illumination test |
